# Supplementary material for: Magnetic core–shell-structured nanoporous organosilica microspheres for the Suzuki–Miyaura coupling of aryl chlorides: improved catalytic activity and facile catalyst recovery
Source: Royal Society of Chemistry journal article supplement (doi:10.1039/c2jm15693h), 2012-01-01
Supplement: c2jm15693h.pdf [file c2jm15693h.pdf]

**Electronic Supplementary Information for**

*Magnetic core-shell-structured nanoporous organosilica microspheres for the Suzuki-Miyaura coupling of aryl chlorides: Improved catalytic activity and facile catalyst recovery*

Hengquan Yang,\* Guang Li and Zhancheng Ma

School of Chemistry and Chemical Engineering, Shanxi University, Taiyuan 030006, PR China.

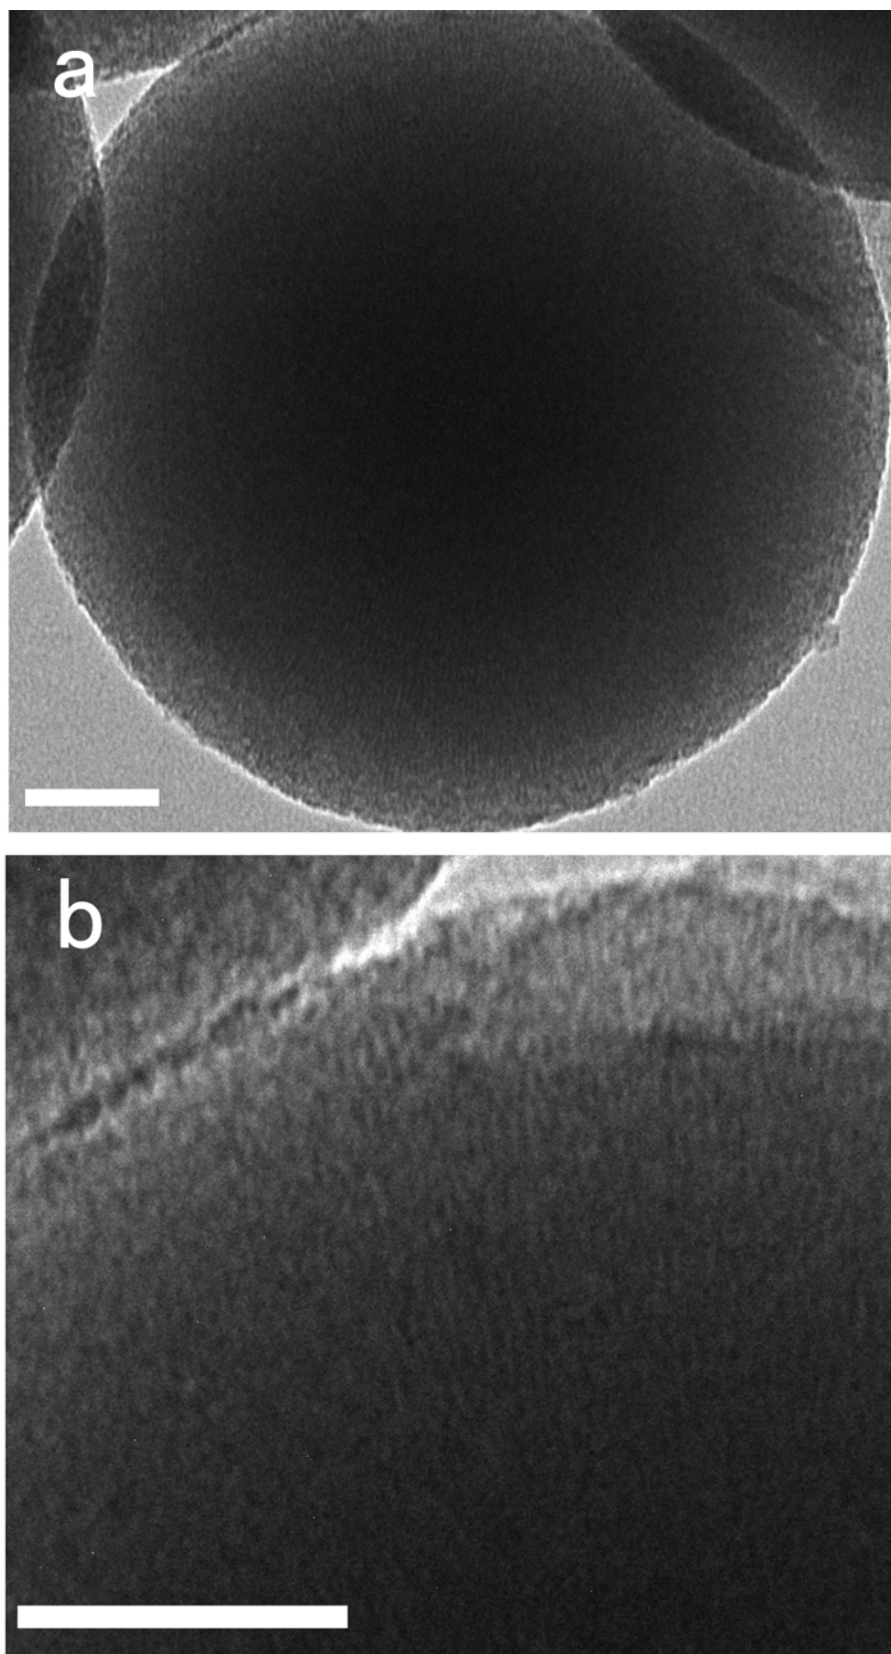

**Fig S1** The TEM image of NHC-functionalized MCM-41 microspheres. The bar is 50 nm.

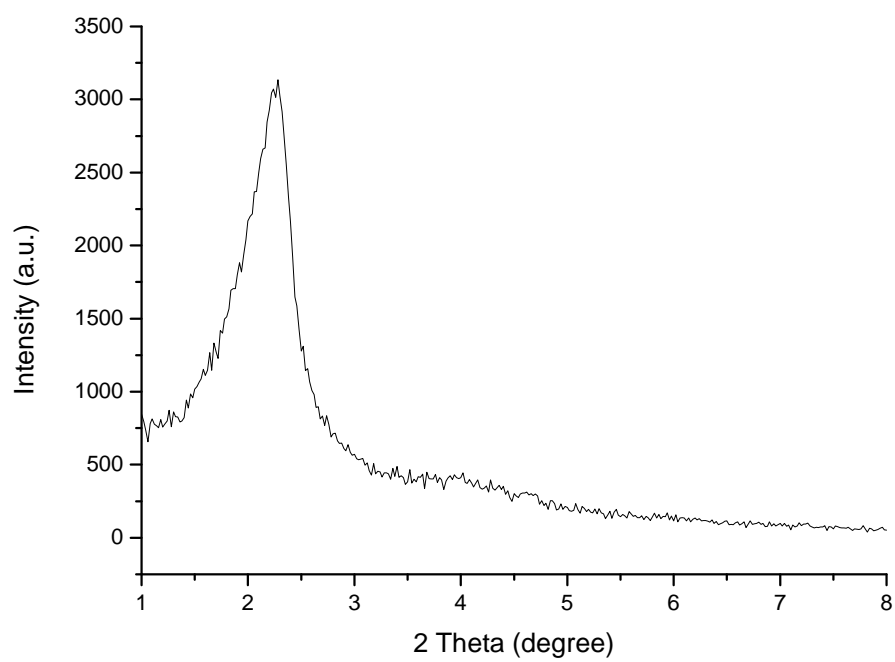

**Fig. S2** XRD pattern of NHC-functionalized MCM-41 microspheres

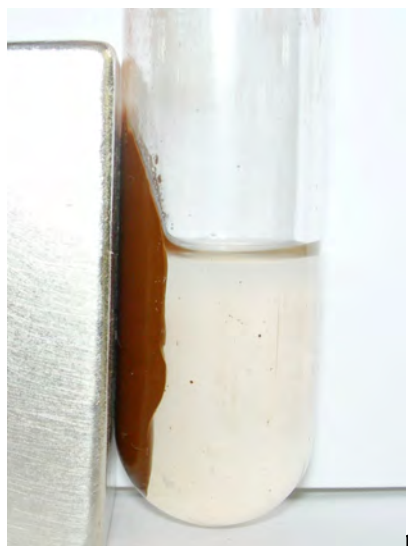

**Fig. S3** Photograph of isolating Fe<sub>3</sub>O<sub>4</sub>@mSiO<sub>2</sub>-NHC(1) after reaction by employing an external field.

**The  $^1\text{H}$  NMR data for the coupling products:**

**biphenyl** ( $\text{CDCl}_3$ , 300 MHz, ppm):  $\delta$  7.57 (d, 4 H,  $J=9$  Hz), 7.41-7.46 (m, 4H), 7.34 (t, 2 H,  $J=7.5$  Hz); **4-methylbiphenyl** ( $\text{CDCl}_3$ , 300 MHz, ppm): 7.59 (d, 2 H,  $J=6$  Hz), 7.24-7.57 (m, 7 H), 2.40(s, 3 H); **2-Methylbiphenyl** ( $\text{CDCl}_3$ , 300 MHz, ppm): 7.11-7.26 (m, 9 H); 2.15 (s, 3 H); **4-fluorobiphenyl** ( $\text{CDCl}_3$ , 300 MHz, ppm): 7.50-7.53 (m, 4 H); 7.40-7.420 (m, 2 H); 7.32-7.33 (m, 1 H), 7.08-7.12 (m, 2 H); **4-trifluoromethylbiphenyl** ( $\text{CDCl}_3$ , 300 MHz, ppm): 7.62 (s, 4 H), 7.51-7.54 (d,  $J = 6.9$  Hz, 2 H), 7.30-7.42 (m, 3 H); **4- $^t$ butylbiphenyl** ( $\text{CDCl}_3$ , 300 MHz, ppm): 7.16-7.46 (m, 9 H), 1.19 (s, 9 H); **1-phenylnaphthalene** ( $\text{CDCl}_3$ , 300 MHz, ppm): 7.28-7.38 (m, 8 H); 7.68-7.47 (m, 4 H); **diphenylmethane** ( $\text{CDCl}_3$ , 300 MHz, ppm): 7.14-7.25 (m, 10 H), 3.93 (s, 2 H); ***p*-benzyltoluene** ( $\text{CDCl}_3$ , 300 MHz, ppm): 6.96-7.14 (m, 9 H), 3.80 (s, 2 H), 2.18 (s, 3 H); ***o*-benzyltoluene** ( $\text{CDCl}_3$ , 300 MHz, ppm): 6.98-7.13 (m, 9 H), 3.84 (s, 2 H), 2.10 (s, 3 H); ***p*-benzylanisole** ( $\text{CDCl}_3$ , 300 MHz, ppm): 6.93-7.11 (m, 7 H), 6.93-7.11); ***o*-benzylanisole** ( $\text{CDCl}_3$ , 300 MHz, ppm): 7.03-7.15 (m, 6 H), 6.92-6.95 (m, 1 H), 6.68-6.76 (m, 2 H), 3.86 (s, 2 H), 3.62 (s, 3 H); **1-benzyl-4-trifluoromethyl methane** ( $\text{CDCl}_3$ , 300 MHz, ppm): 7.36-7.39 (m, 2 H), 7.01-7.16 (m, 2 H), 3.85 (s, 2 H); **1-benzyl-naphthalene** ( $\text{CDCl}_3$ , 400 MHz, ppm): 7.19-7.98 (m, 12 H), 4.35 (s, 2 H).
